# Supplementary material for: Current progress in the environmental analysis of poly- and perfluoroalkyl substances (PFAS)
Source: Royal Society of Chemistry journal article supplement (doi:10.1039/d2va00147k), 2022-01-01
Supplement: d2va00147k1.xlsx [file d2va00147k1.xlsx]

## Sheet: target
Identified PFAS	Matrix	Sampling	Extraction methods	Analysis instrument	Detection limit (LOD/LOQ/MDL/MQL)	QA/QC	Reported concentration levels	References
PFHxS, PFOS, PFDS, PFOA, fluorinated alkylpolyglycol ether	Sediment		Hot vapour /Soxhelt extraction & PLE	LC/(-)ESI-MS/MS, GC/ECD, flow injection-MS/MS	6000–10,000 ng/g dw			Schröder, H.F., 2003. Determination of fluorinated surfactants and their metabolites in sewage sludge samples by liquid chromatography with mass spectrometry and tandem mass spectrometry after pressurised liquid extraction and separation on fluorine-modified reversed-phase sorbents. J. Chromatogr. A 1020 (1), 131–151.
PFHxA, PFHpA, PFTrDA PFUnDA, PFOA, PFDoA,	Soil, sediment and sludge	5g solid samples	d-SLE	LC/(-)ESI-MS/MS	1 ng/g (LOQ)	matix spike	0.61-3.94 ng/g	Powley C.R., George S.W., Ryan T.W., Buck R.C. Matrix effect-free analytical methods for determination of perfluorinated carboxylic acids in environmental matrixes Anal. Chem., 77 (19) (2005), pp. 6353-6358
PFOA, PFDA, PFUnA, PFDoA, PFTA, PFDS, PFNA, PFOS, PFHxS, N-Et-FOSAA, N-Me-FOSAA	Sediment, sludge	sediments (top 1-5 cm) and sludge ground and homogenized with a mortar and pestle passed through a 2.36-mm sieve	SLE	LC/(-)ESI-MS/MS	0.011–2.2 ng/g	sequential extraction experiments, standard additions, spike/recovery experiments	PFAS: 55-3370 ng/g PFOS: 36-2900 ng/g PFCA: 5-152 ng/g PFC: 73-3390 ng/g	Higgins C.P., Field J.A., Criddle C.S., Luthy R.G. Quantitative determination of perfluorochemicals in sediments and domestic sludge Environ. Sci. Technol., 39 (11) (2005), pp. 3946-3956
PFOA, PFDA	Harbour sediment	sampling with a van Veen grab	PLE and SPME	GC-NCI/MS	0.5–0.8 ng/g	surrogate (PFC12A) addition	10.4-12.4 ng/g	Alzaga R., Salgado-Petinal C., Jover E., Bayona J. Development of a procedure for the determination of perfluorocarboxylic acids in sediments by pressurised fluid extraction, headspace solid-phase microextraction followed by gas chromatographic–mass spectrometric determination J. Chromatogr. A, 1083 (1–2) (2005), pp. 1-6
PFHS, PFBS, PFOSA, PFOS, PFNA, PFDA, PFUnDA, PFDoDA, PFTDA, PFHxDA, PFOcDA, PFOA, 8:2 FTUCA, 8:2 FTCA	STP sludge		SPE	LC/(-)ESI-MS/MS	10–25 ng/g	standard addition	PFOA 58-1050 ng/L PFOS 3-68 ng/L	Sinclair E., Kannan K. Mass loading and fate of perfluoroalkyl surfactants in wastewater treatment plants Environ. Sci. Technol., 40 (5) (2006), pp. 1408-1414
PFOA, PFNA, PFDA	Soil		SLE	LC/(-)ESI-MS/MS	0.6 ng/g	matix spike	PFOA 3.4 - 190 ng/L	Washington J.W., Ellington J.J., Jenkins T.M., Evans J.J. Analysis of perfluorinated carboxylic acids in soils: detection and quantitation issues at low concentrations J. Chromatogr. A, 1154 (1–2) (2007), pp. 111-120
PFXA, PFHA, PFOA, PFNA, PFDA	Soil		SLE	LC/(-)ESI-MS/MS	14 fg		PFOA 3.4 - 190 ng/L	Washington J.W., Henderson W.M., Ellington J.J., Jenkins T.M., Evans J.J. Analysis of perfluorinated carboxylic acids in soils II: optimization of chromatography and extraction J. Chromatogr. A, 1181 (1–2) (2008), pp. 21-32
PFOA, PFHxA, PFDoA	Ground water		SPE	GC/EI-MS	36,000 ng/L (LOQ)		ΣPFCAs 125- 7090 μg/L	Moody C.A., Field J.A. Determination of perfluorocarboxylates in groundwater impacted by fire-fighting activity Environ. Sci. Technol., 33 (16) (1999), pp. 2800-2806
PFOA, PFOS	River water	1-L Nalgene (Rochester, NY) polypropylene containers with narrow-mouth bottles and screw tops	SPE	LC/(-)ESI-MS/MS	10–50 ng/L (MQL)	matix spike	PFOS 21.4-136 ng/L PFOA <25-598 ng/L	Hansen K.J., Johnson H., Eldridge J., Butenhoff J., Dick L. Quantitative characterization of trace levels of PFOS and PFOA in the Tennessee River Environ. Sci. Technol., 36 (8) (2002), pp. 1681-1685
PFPeA, PFHxA, PFHpA, PFOA, PFDoA, PFBS, PFHxS, PFOS	Surface water		SPE	LC/(-)ESI-MS/MS 19F-NMR	9–17 ng/L (LOQ) 10,000 ng/L (MDL)			Hansen K.J., Johnson H., Eldridge J., Butenhoff J., Dick L. Quantitative characterization of trace levels of PFOS and PFOA in the Tennessee River Environ. Sci. Technol., 36 (8) (2002), pp. 1681-1685
PFBS, PFHxS, PFOS, PFOA, PFNA, PFOSA	Surface and deep seawater	stainless steel grab sampler with a polypropylene rope and were then transferred into 1-L narrow-mouth polypropylene bottles with screw tops	SPE	LC/(-)ESI-MS/MS	0.0001–0.0052 ng/L (LOD)		PFOS <17-25400 pg/L PFHS <0.2-5600 pg/L PFOA 17-192000 pg/L PFOSA NA-3.0 pg/L	Yamashita N., Kannan K., Taniyasu S., Horii Y., Okazawa T., Petrick G., Gamo T. Analysis of perfluorinated acids at parts-per-quadrillion levels in seawater using liquid chromatography-tandem mass spectrometry Environ. Sci. Technol., 38 (21) (2004), pp. 5522-5528
PFOA, PFOS	River water		SPE	LC/(-)ESI-MS/MS	10–50 ng/L (MQL)		16.8- 144 ng/L	Hansen K.J., Johnson H., Eldridge J., Butenhoff J., Dick L. Quantitative characterization of trace levels of PFOS and PFOA in the Tennessee River Environ. Sci. Technol., 36 (8) (2002), pp. 1681-1685
PFBS, PFOS	Ground, river and tap water			LC/(-)ESI-MS/MS	25,000 ng/L (LOQ)		0.4–1.5 mg/L	Hebert G.N., Odom M.A., Craig P.S., Dick D.L., Strauss S.H. Method for the determination of sub-ppm concentrations of perfluoroalkylsulfonate anions in water J. Environ. Monit., 4 (1) (2002), pp. 90-95
PFOS	River water		Turbulent flow chromatography based online extraction	LC/(-)APPI-MS	5.35 ng/L (LOD)		4.3- 26 pg/mL1	Takino M., Daishima S., Nakahara T. Determination of perfluorooctane sulfonate in river water by liquid chromatography/atmospheric pressure photoionization mass spectrometry by automated on-line extraction using turbulent flow chromatography Rapid Commun. Mass Spectrom., 17 (5) (2003), pp. 383-390
PFOA, PFOS, PFOSAA, N-Et-FOSAA, FOSA, N-Et-FOSA, N-Et-FOSE	Surface water	A high-flow submersible pump pumped raw water from each site through 1/2 in. diameter polyethylene tubing into a 120 L stainless steel tank	SPE	LC/(-)ESI-MS	0.2–13 ng/L (LOQ)	field blanks, spike addition, duplicate	PFOS 15-121 ng/L PFOSAA ND-6.5 ng/L PFOA 15-53 ng/L POSA NA-2.3 pg/L	Boulanger B., Vargo J., Schnoor J.L., Hornbuckle K.C. Detection of perfluorooctane surfactants in Great Lakes water Environ. Sci. Technol., 38 (15) (2004), pp. 4064-4070
PFOS, PFOA, PFNA, PFDA, PFUnA, PFDoA, 6:2, 8:2, 10:2 FTCA, 6:2, 8:2, 10:2 FTUCA	Rain water	collected in triplicate into 20-L stainless steel cans prerinsed with methanol.	SPE	LC/(-)ESI-MS/MS	0.04–7.2 ng/L	Triplicate blanks	0.12 - 0.9 ng/L	Loewen M., Halldorson T., Wang F., Tomy G. Fluorotelomer carboxylic acids and PFOS in rainwater from an urban center in Canada Environ. Sci. Technol., 39 (9) (2005), pp. 2944-2951
PFBS, PFHxS, PFOS, 4:2, 6:2, 8:2 FTS	Ground water	stored in high-density polyethylene brown bottles at 4 °		LC/(-)ESI-MS/MS	470–5000 ng/L (LOQ)	field blanks, spike addition, duplicate	4:2 FtS ND-7.3 ug/L 6:2 FtS ND-14600 ug/L 8:2 FtS ND-8.7 ug/L PFBS ND-210 ug/L PFPS ND-216 ug/L PFHxS ND-876 ug/L PFOS ND-2300 ug/L PFOA ND-6570 ug/L	Schultz M.M., Barofsky D.F., Field J.A. Quantitative determination of fluorotelomer sulfonates in groundwater by LC MS/MS Environ. Sci. Technol., 38 (6) (2004), pp. 1828-1835
PFOS, PFOA, PFNA, PFDA, PFUnA, PFHxA, PFHpA	Surface water	rosette sampler, which is equipped with 8 L polyethylene canisters that can be closed at varying depths. Water was transferred from the rosette canisters to 4 L HPDE bottles totaling 4 L from each site/depth.	SPE	LC/(-)ESI-MS	0.28–0.58 ng/L (LOQ)	matix spike	PFOS ND-47 ng/L	Simcik M.F., Dorweiler K.J. Ratio of perfluorochemical concentrations as a tracer of atmospheric deposition to surface waters Environ. Sci. Technol., 39 (22) (2005), pp. 8678-8683
PFOS, PFDS, PFHxA, PFHpA, PFOA, PFNA, PFDA, PFUnA, PFDoA	STP effluent		Automated SPE, LLE	LC/(-)ESI-MS/MS	0.2–6.4 ng/L 0.26–4.4 ng/L (MDL)			González-Barreiro C., Martínez-Carballo E., Sitka A., Scharf S., Gans O. Method optimization for determination of selected perfluorinated alkylated substances in water samples Anal. Bioanal. Chem., 386 (7–8) (2006), pp. 2123-2132
PFOA, PFOS	River water		Online-SPE	Nano-LC/nano(-) ESI-MS	0.5–1 ng/L		59 - 130 ng/L	Wilson S.R., Malerød H., Holm A., Molander P., Lundanes E., Greibrøkk T. On-line SPE—Nano-LC—Nanospray-MS for rapid and sensitive determination of perfluorooctanoic acid and perfluorooctane sulfonate in river water J. Chromatogr. Sci., 45 (3) (2007), pp. 146-152
PFBA, PFPeA, PFHxA, PFHpA, PFOA, PFNA, PFDA	STP effluent, surface and rain water		LLE	GC/MS	0.5 ng/L		0.5 - 100 ng/L	Scott B.F., Moody C.A., Spencer C., Small J.M., Muir D.C., Mabury S.A. Analysis for perfluorocarboxylic acids/anions in surface waters and precipitation using GC- MS and analysis of PFOA from large-volume samples Environ. Sci. Technol., 40 (20) (2006), pp. 6405-6410
PFHeA, PFOA, PFNA, PFDeA, PFOS	River and wastewater		SPE	LC/(-)ESI-MS/MS	0.05–0.28 ng/L (MDL)		0.3 - 17.2 ng/L	Zhao X., Li J., Shi Y., Cai Y., Mou S., Jiang G. Determination of perfluorinated compounds in wastewater and river water samples by mixed hemimicelle-based solid-phase extraction before liquid chromatography–electrospray tandem mass spectrometry detection J. Chromatogr. A, 1154 (1–2) (2007), pp. 52-59
PFOS, PFHxS, PFBS, PFOSA, PFOcDA, PFHxDA, PFTeDA, PFDoDA, PFUnDA, PFDA, PFNA, PFOA, PFHpA, PFHxA, PFPeA, PFBA, N-Et-FOSA, N-Et-FOSAA, 8:2, 10:1 FTOH, 8:2 FTCA, 8:2 FTUCA	Coastal water		SPE	LC/(-)ESI-MS/MS	0.016–0.1 ng-F/L (LOQ)		trifluoroacetic acid 1- 230 ng/L	Miyake Y., Yamashita N., Rostkowski P., So M.K., Taniyasu S., Lam P.K., Kannan K. Determination of trace levels of total fluorine in water using combustion ion chromatography for fluorine: a mass balance approach to determine individual perfluorinated chemicals in water J. Chromatogr. A, 1143 (1–2) (2007), pp. 98-104
PFOS, PFOA	Fresh water Tap water		SPE	LC/(-)ESI-MS/MS	0.26–22 ng/L and 5.2–92 ng/L; 0.16–22 ng/L and 2.3–84 ng/L		PFOS 0.16- 22 ng/L, PFOA 2.3- 92 ng/L	Takagi S., Adachi F., Miyano K., Koizumi Y., Tanaka H., Mimura M., Watanabe I., Tanabe S., Kannan K. Perfluorooctanesulfonate and perfluorooctanoate in raw and treated tap water from Osaka, Japan Chemosphere, 72 (10) (2008), pp. 1409-1412
PFBS, PFHxA, PFHpA, PFOA, PFNA, PFOS	River water		Automated solid phase extraction	LC/(-)ESI-MS/MS	0.2–100 ng/L		PFOS ND - 26 ng/L	Loos R., Tavazzi S., Mariani G., Suurkuusk G., Paracchini B., Umlauf G. Analysis of emerging organic contaminants in water, fish and suspended particulate matter (SPM) in the joint danube survey using solid-phase extraction followed by UHPLC-MS-MS and GC–MS analysis Sci. Total Environ., 607 (2017), pp. 1201-1212
PFBA, PFPeA, PFHxA, PFHpA, PFOA, 4:2 FTSA, 6:2 FTSA	Surface, drinking and river water		SPME	LC/GC–MS/MS	13–131.9 ng/L		ΣPFAS 4 -98 ng/L	Boiteux V., Dauchy X., Bach C., Colin A., Hemard J., Sagres V., Rosin C., Munoz J.-F. Concentrations and patterns of perfluoroalkyl and polyfluoroalkyl substances in a river and three drinking water treatment plants near and far from a major production source Sci. Total Environ., 583 (2017), pp. 393-400
PFOS, PFOA, PFHxA, PFHpA, PFHxS, PFPeA, PFBA, PFNA, PFDA, PFBS	Fresh and treated water		Automated SPE	LC/(-)ESI-MS/MS	Max. 76 ng/L		PFOS 4 - 62 ng/L; PFHxS 4 - 32 ng/L; PFHxA 4 - 28 ng/L; PFOA 4- 12 ng/l	Boiteux V., Dauchy X., Rosin C., Munoz J.-F. National screening study on 10 perfluorinated compounds in raw and treated tap water in France Arch. Environ. Contam. Toxicol., 63 (1) (2012), pp. 1-12
4:2, 6:2, 8:2 FtTAoS, 4:2, 6:2, 8:2 FtS, PFBSaAm, PFPeSaAm, PFHxSaAm, PFBS, PFFOSaAm, PFBSaAmA, PFOS, PFPeSaAmA, PFHxSaAmA, PFBA, PFHpS, PFDS, PFHxS, PFFOSaAmA, PFPeA, PFHxA, PFHpA, PFOA, PFNA, PFDA, PFUdA, PFDoA, PFTrA, PFTeA	Ground water		Micro-LLE	LC/(-/+)ESI-MS/MS	0.71–67 ng/L (MDL)		ΣPFAS ND- 6900 ng/L	Backe W.J., Day T.C., Field J.A. Zwitterionic, cationic, and anionic fluorinated chemicals in aqueous film forming foam formulations and groundwater from US military bases by nonaqueous large-volume injection HPLC-MS/MS Environ. Sci. Technol., 47 (10) (2013), pp. 5226-5234
PFBA, PFPeA, PFHxA, PFHpA, PFOA, PFNA, PFDA, PFUnDA, PFDoDA, PFTrDA, PFTeDA, PFBS, PFHxS, PFOS, PFDS, FOSA, 6:2FTSA, 6:2FTUA, 8:2FTUA, 5:3FTCA, PFOAB	Drinking water		Automated off line SPE	UHPLC-HRMS	Up to 39 ng/L		PFCAs, PFSA, and FTCAs ND to 39 ng/L	Kaboré H.A., Duy S.V., Munoz G., Méité L., Desrosiers M., Liu J., Sory T.K., Sauvé S. Worldwide drinking water occurrence and levels of newly-identified perfluoroalkyl and polyfluoroalkyl substances Sci. Total Environ., 616 (2018), pp. 1089-1100
PFHxS, PFHpA, PFOA, PFOS, PFNA, PFDA	Drinking, tap, lake and pond water		Bamboo-charcoal based SPE	LC/(-)ESI-MS/MS	0.01–1.15 ng/L		ΣPFAS 0.1–1000 ng/L	Deng Z.-H., Cheng C.-G., Wang X.-L., Shi S.-H., Wang M.-L., Zhao R.-S. Preconcentration and determination of perfluoroalkyl substances (PFASs) in water samples by Bamboo Charcoal-based solid-phase extraction prior to Liquid Chromatography–Tandem mass spectrometry Molecules, 23 (4) (2018), p. 902
PFBS, PFPeS, PFHxS, PFHpS, PFOS, PFNS, PFDS, PFDoS, PFBA, PFPeA, PFHxA, PFHpA, PFOA, PFNA, PFDA, PFUnDA, PFDoA, PFTrDA, PFTeDA, PFHxDA, PFODA	Estuarine water		SPE	LC/(-)ESI-MS/MS	0.48–1.68 pg/inject		ΣPFAS 4.48- 25.1 ng/L	Mulabagal V., Liu L., Qi J., Wilson C., Hayworth J.S. A rapid UHPLC-MS/MS method for simultaneous quantitation of 23 perfluoroalkyl substances (PFAS) in estuarine water Talanta, 190 (2018), pp. 95-102
PFOA, TFA, PFPrA, PFBA, PFPeA, PFHxA, PFHpA	Surface, ground and drinking water		SPE	LC/(-)ESI-MS/MS	0.1–3.3 ng/L		PFCAs 0.056 - 2.2 μg/L, TFA 0.045- 17 μg/L	Janda J., Nödler K., Brauch H.-J., Zwiener C., Lange F.T. Robust trace analysis of polar (C 2-C 8) perfluorinated carboxylic acids by liquid chromatography-tandem mass spectrometry: method development and application to surface water, groundwater and drinking water Environ. Sci. Pollution Res., 26 (8) (2019), pp. 7326-7336
PFOSA, N-Et-PFOSA	Fast food and fish		SLE	GC/P IC-MS	0.1–0.25 ng/L (MDL)		0.5- 14 ng/g wet weight	Tittlemier S.A., Pepper K., Edwards L., Tomy G. Development and characterization of a solvent extraction–gas chromatographic/mass spectrometric method for the analysis of perfluorooctanesulfonamide compounds in solid matrices J. Chromatogr. A, 1066 (1–2) (2005), pp. 189-195
PFOS, PFHS, PFBS, PFUnDA, PFDA, PFNA, PFOA, PFHpA, PFHxA	Seafood		IPE	LC/(-)ESI-MS/MS	0.25 ng/L (LOQ)		PFOS 0.3- 13.9 ng/g wet weight	Gulkowska A., Jiang Q., So M.K., Taniyasu S., Lam P.K., Yamashita N. Persistent perfluorinated acids in seafood collected from two cities of China Environ. Sci. Technol., 40 (12) (2006), pp. 3736-3741
PFOS, PFHpA, PFDoDA, PFTeDA	Meat, fish, fast food and food packaging materials		SLE	LC/(-)ESI-MS/MS	0.5–6 ng/g		0.5 - 4.5 ng/g	Tittlemier S.A., Pepper K., Seymour C., Moisey J., Bronson R., Cao X.-L., Dabeka R.W. Dietary exposure of Canadians to perfluorinated carboxylates and perfluorooctane sulfonate via consumption of meat, fish, fast foods, and food items prepared in their packaging J. Agricult. Food Chem., 55 (8) (2007), pp. 3203-3210
PFOS, PFOA, PFDA, PFPA, PFBS, PFNA	Fish		PLE & SPE	LC–QqLIT–MS	0.003–0.05 μg/kg (LOQ)			Llorca M., Farré M., Picó Y., Barceló D. Development and validation of a pressurized liquid extraction liquid chromatography–tandem mass spectrometry method for perfluorinated compounds determination in fish J. Chromatogr. A, 1216 (43) (2009), pp. 7195-7204
PFOA, PFOS	Fish		LLE	LC/(–)ESI–MS/MS	7.5 μg/kg			Nania V., Pellegrini G.E., Fabrizi L., Sesta G., De Sanctis P., Lucchetti D., Di Pasquale M., Coni E. Monitoring of perfluorinated compounds in edible fish from the Mediterranean Sea Food Chem., 115 (3) (2009), pp. 951-957
PFOA, PFOS, PFNA, ip-PFNA, PFDA, PFDS	Baby foods		SPE	LC-QqLIT-MS	1.2–362 ng/g (MLOD)			Llorca M., Farré M., Picó Y., Teijón M.L., Álvarez J.G., Barceló D. Infant exposure of perfluorinated compounds: levels in breast milk and commercial baby food Environ. Int., 36 (6) (2010), pp. 584-592
PFBS, PFOA, PFDA, PFUnA, PFTeA, PFHxA, PFHxS, PFOS	Muscle and liver of fish and bird		Micro-extraction	LC/(–)ESI–MS/MS	0.4–6 ng/g			Luque N., Ballesteros-Gómez A., van Leeuwen S., Rubio S. Analysis of perfluorinated compounds in biota by microextraction with tetrahydrofuran and liquid chromatography/ion isolation-based ion-trap mass spectrometry J. Chromatogr. A, 1217 (24) (2010), pp. 3774-3782
PFOA, PFOS	Commercial fish		SPE	LC-QqLIT-MS	5.4–17.2 ng/g			Squadrone S., Ciccotelli V., Prearo M., Favaro L., Scanzio T., Foglini C., Abete M. Perfluorooctane sulfonate (PFOS) and perfluorooctanoic acid (PFOA): emerging contaminants of increasing concern in fish from Lake Varese, Italy Environ. Monit. Assess., 187 (7) (2015), p. 438
PFBA, PFHxPA, PFPeA, PFBS, PFHxA, PFOPA, PFHpA, PFHxS, PFOA, PFDPA, PFNA, PFOS, PFOSA, PFDA	Vegetables Fish Soil		Focused ultrasound solid–liquid extraction (FUSLE) and SPE	LC/(-)ESI-MS/MS	0.3–12.4 ng/g (MDL) 0.2–12.5 ng/g (MDL)			Zabaleta I., Bizkarguenaga E., Iparragirre A., Navarro P., Prieto A., Fernández L.Á., Zuloaga O. Focused ultrasound solid–liquid extraction for the determination of perfluorinated compounds in fish, vegetables and amended soil J. Chromatogr. A, 1331 (2014), pp. 27-37
PFOS, PFOA, PFHxS, PFHxA, PFOSA	Food ingredients		SLE	LC/(-)ESI-MS/MS	0.05–0.2 ng/L		PFOS 7.1-22.7 µg/L; PPFOA 3.3-8.9 µg/L	Fromme H., Schlummer M., Möller A., Gruber L., Wolz G., Ungewiss J., Böhmer S., Dekant W., Mayer R., Liebl B. Exposure of an adult population to perfluorinated substances using duplicate diet portions and biomonitoring data Environ. Sci. Technol., 41 (22) (2007), pp. 7928-7933
PFBA, PFPeA, PFHxA, PFHpA, PFNA, PFDA, PFBS, PFHxS, PFOS, PFOSA, PFHxPA, PFOPA, PFDPA	Muscle and liver of fish		Focused ultrasonic solid–liquid extraction (FUSLE)	LC/(-)ESI-MS/MS	1.4–8 ng/g		PFOS 24–54 ng/g	Zabaleta I., Bizkarguenaga E., Prieto A., Ortiz-Zarragoitia M., Fernández L., Zuloaga O. Simultaneous determination of perfluorinated compounds and their potential precursors in mussel tissue and fish muscle tissue and liver samples by liquid chromatography–electrospray-tandem mass spectrometry J. Chromatogr. A, 1387 (2015), pp. 13-23
PFOA, PFHA, PFOS	Human plasma		Online extraction	LC/(-ESI)-IT-MS/MS	0.2–0.5 ng/mL		PFOA 1- 200 ng/mL; PFOS 5- 200 ng/mL	Holm A., Wilson S.R., Molander P., Lundanes E., Greibrokk T. Determination of perfluorooctane sulfonate and perfluorooctanoic acid in human plasma by large volume injection capillary column switching liquid chromatography coupled to electrospray ionization mass spectrometry J. Sep. Sci., 27 (13) (2004), pp. 1071-1079
PFOS, PFNA, PFOA	Human liver, brain and kidney		SPE	LC/(-)ESI-MS/MS	0.1–0.2 ng/mL (LOQ)		PFOA 0.3- 3.8 ng/g; L-PFOS 1.0- 13.6 ng/g	Maestri L., Negri S., Ferrari M., Ghittori S., Fabris F., Danesino P., Imbriani M. Determination of perfluorooctanoic acid and perfluorooctanesulfonate in human tissues by liquid chromatography/single quadrupole mass spectrometry Rapid Commun. Mass Spectrom.: Int. J. Devoted Rapid Dissem. Up-to-the-Min. Res. Mass Spectrom., 20 (18) (2006), pp. 2728-2734
PFOS, PFOA, PFOSA	Human plasma		Online SPE	LC/(-ESI)-MS	0.5–1 ng/mL (LOQ)			Inoue K., Okada F., Ito R., Kawaguchi M., Okanouchi N., Nakazawa H. Determination of perfluorooctane sulfonate, perfluorooctanoate and perfluorooctane sulfonylamide in human plasma by column-switching liquid chromatography–electrospray mass spectrometry coupled with solid-phase extraction J. Chromatogr. B, 810 (1) (2004), pp. 49-56
PFOSA, Me-PFOSA-AcOH, Et-PFOSA-AcOH, PFHxS, PFOS, PFPeA, PFHxA, PFHpA, PFOA, PFNA, PFDeA, PFUA, PFDoA	Human serum Breast milk		Automated SPE	LC/(-)ESI-MS/MS	0.1–3.2 ng/mL 0.1–1 ng/mL		PFOS 1-335 ng/mL	Kuklenyik Z., Reich J.A., Tully J.S., Needham L.L., Calafat A.M. Automated solid-phase extraction and measurement of perfluorinated organic acids and amides in human serum and milk Environ. Sci. Technol., 38 (13) (2004), pp. 3698-3704
PFOA	Human blood			LC/(-)ESI-MS/MS	0.5 ng/mL (LOQ)			Flaherty J.M., Connolly P.D., Decker E.R., Kennedy S.M., Ellefson M.E., Reagen W.K., Szostek B. Quantitative determination of perfluorooctanoic acid in serum and plasma by liquid chromatography tandem mass spectrometry J. Chromatogr. B, 819 (2) (2005), pp. 329-338
PFOA, PFOS, PFAD	Human serum		MTBE	LC/(-)ESI-MS/MS	0.02–0.18 ng/ mL			Wu M., Sun R., Wang M., Liang H., Ma S., Han T., Xia X., Ma J., Tang L., Sun Y. Analysis of perfluorinated compounds in human serum from the general population in Shanghai by liquid chromatography-tandem mass spectrometry (LC-ms/MS) Chemosphere, 168 (2017), pp. 100-105
PFBS, PFHS, PFOS, PFOA	Human serum, blood and plasma		SPE	LC/(-)ESI-MS/MS	1 ng/mL (LOQ)		PFBS 5- 25 ng/mL; PFHxS 5- 75 ng/mL; PFOS 5- 880 ng/mL; PFOA 5- 7320 ng/mL	Ehresman D.J., Froehlich J.W., Olsen G.W., Chang S.-C., Butenhoff J.L. Comparison of human whole blood, plasma, and serum matrices for the determination of perfluorooctanesulfonate (PFOS), perfluorooctanoate (PFOA), and other fluorochemicals Environ. Res., 103 (2) (2007), pp. 176-184
PFOS, PFHS, PFOA	Human serum			LC/(-)ESI-MS/MS	0.5–1.6 ng/mL (LOQ)		PFHxS 16–1,295 ng/mL; PFOS 145–3,490 ng/mL; PFOA 72–5,100 ng/mL	Olsen G.W., Burris J.M., Ehresman D.J., Froehlich J.W., Seacat A.M., Butenhoff J.L., Zobel L.R. Half-life of serum elimination of perfluorooctanesulfonate, perfluorohexanesulfonate, and perfluorooctanoate in retired fluorochemical production workers Environ. Health Perspect., 115 (9) (2007), p. 1298
PFHxS, PFOS, PFOA, PFNA, PFDA, PFUnDA, PFDoDA	Human blood			LC/(-)ESI-MS/MS	52–1.9 ng/L		PFAAS ND- 44.7 ng/mL	Lindh C.H., Rylander L., Toft G., Axmon A., Rignell-Hydbom A., Giwercman A., Pedersen H.S., Góalczyk K., Ludwicki J.K., Zvyezday V. Blood serum concentrations of perfluorinated compounds in men from Greenlandic Inuit and European populations Chemosphere, 88 (11) (2012), pp. 1269-1275
PFOA, PFOS	Human plasma			LC/(-)ESI-MS/MS	1.0 ng/mL, 3.4 ng/mL			Olsen G.W., Mair D.C., Reagen W.K., Ellefson M.E., Ehresman D.J., Butenhoff J.L., Zobel L.R. Preliminary evidence of a decline in perfluorooctanesulfonate (PFOS) and perfluorooctanoate (PFOA) concentrations in American Red Cross blood donors Chemosphere, 68 (1) (2007), pp. 105-111
PFOA	Human serum		LLE	LC/(-)ESI-MS/MS	0.5 ng/mL		0.5– 100 ng/ml	Rogatsky E., O’Hehir C., Daly J., Tedesco A., Jenny R., Aldous K. Development of high throughput LC/MS/MS method for analysis of perfluorooctanoic acid from serum, suitable for large-scale human biomonitoring J. Chromatogr. B, 1049 (2017), pp. 24-29
6:2 PAP, 8:2 PAP, 6:2 diPAP, 8:2 diPAP, PFHxPA, PFOPA, PFDPA, PFBS, PFHxS, PFHpS, PFOS, PFDS, PFPeA, PFHxA, PFHpA, PFOA, PFNA, PFDA, PFUnDA, PFDoDA, PFTrDA, PFTeDA, PFOSA, MeFOSA, EtFOSA	Human serum, plasma and whole blood		Online solid phase extraction	LC/(-)ESI-MS/MS	0.0018–0.09 ng/mL		6:2 PAP 0.09−0.39 ng/mL; 6:2 diPAP 0.018−0.14 ng/mL; 8:2 diPAP 0.009−0.11 ng/mL <0.09−0.39 ng mL−1	Poothong S., Thomsen C., Padilla-Sanchez J.A., Papadopoulou E., Haug L.S. Distribution of novel and well-known poly-and perfluoroalkyl substances (PFASs) in human serum, plasma, and whole blood Environ. Sci. Technol., 51 (22) (2017), pp. 13388-13396
PFPeA, PFHxA, PFHpA, PFOA, PFNA, PFDA, PFUnDA, PFDoDA, PFTrDA, PFTeDA, PFHxDA, PFOcDA, PFBS, PFHS, PFOS, PFDS	Breast milk		MTBE	LC/(-)ESI-MS/MS	0.025–0.01 ng/mL (LOQ)		ΣPFAS 31.7- 1004 ng/L	Lee S., Kim S., Park J., Kim H.-J., Choi G., Choi S., Kim S., Kim S.Y., Kim S., Choi K. Perfluoroalkyl substances (PFASs) in breast milk from Korea: Time-course trends, influencing factors, and infant exposure Sci. Total Environ., 612 (2018), pp. 286-292
N-Et-FOSA, N-Me-FOSE, N-Et-FOSE, 4:2, 8:2, 10:2 N-Et-FOSE	Outdoor air			GC/PCI-GS, GC/NCI-GS	0.15–6.2 pg/m3			Martin J.W., Muir D.C., Moody C.A., Ellis D.A., Kwan W.C., Solomon K.R., Mabury S.A. Collection of airborne fluorinated organics and analysis by gas chromatography/chemical ionization mass spectrometry Anal. Chem., 74 (3) (2002), pp. 584-590
PFOA, PFOS	Dust		SLE	LC/(-)ESI-MS/MS	10–50 ng/g (LOQ)			Moriwaki H., Takata Y., Arakawa R. Concentrations of perfluorooctane sulfonate (PFOS) and perfluorooctanoic acid (PFOA) in vacuum cleaner dust collected in Japanese homes J. Environ. Monit., 5 (5) (2003), pp. 753-757
N-Et-FOSA, N-Et-FOSE, N-Me-FOSEA	Indoor and outdoor air		Soxhlet extraction	GC/EI-MS, GC/NCI-GS	<0.3–20 pg/m3 (MDL)		0.3- 20 pg/m3	Shoeib M., Harner T., Ikonomou M., Kannan K. Indoor and outdoor air concentrations and phase partitioning of perfluoroalkyl sulfonamides and polybrominated diphenyl ethers Environ. Sci. Technol., 38 (5) (2004), pp. 1313-1320
N-Et-FOSA, N-Me-FOSE, N-Et-FOSE, N-Me-FOSEA	Indoor and outdoor air Dust		Soxhlet extraction	GC/EI-MS, GC/NCI-GS	0.01–7.1 pg/m3 (MDL) 1.2–6.1 pg (LOD)			Shoeib M., Harner T., Wilford B.H., Jones K.C., Zhu J. Perfluorinated sulfonamides in indoor and outdoor air and indoor dust: occurrence, partitioning, and human exposure Environ. Sci. Technol., 39 (17) (2005), pp. 6599-6606
PFOA, PFOSA, PFOS, PFBS, PFHS	Dust		SLE	LC/(-)ESI-MS/MS	0.99–4.56 ng/g (MDL)			Kubwabo C., Stewart B., Zhu J., Marro L. Occurrence of perfluorosulfonates and other perfluorochemicals in dust from selected homes in the city of Ottawa, Canada J. Environ. Monit., 7 (11) (2005), pp. 1074-1078
PFOS, PFOA, N-Et-FOSA, N-Me-FOSE, N-Me-FOSAA, PFOSAA, PFOSA	Outdoor air		Solvent extraction	LC/(-)ESI-MS			0.5 - 6.4 pg/me	Boulanger B., Peck A.M., Schnoor J.L., Hornbuckle K.C. Mass budget of perfluorooctane surfactants in Lake Ontario Environ. Sci. Technol., 39 (1) (2005), pp. 74-79
N-Me-FOSEA, N-Me-FOSE, N-Et-FOSE, 6:2, 8:2, 10:2 FTOH	Outdoor air		Soxhlet extraction	GC/EI-MS, GC/PCI-MS	0.001–3.5 pg/m3 (MDL)			Shoeib M., Harner T., Vlahos P. Perfluorinated chemicals in the Arctic atmosphere Environ. Sci. Technol., 40 (24) (2006), pp. 7577-7583
N-Me-FOSE, N-Et-FOSE, N-Me-FOSA, N-Et-FOSA, 4:2 ,6:2, 8:2, 10:2 FTOH	Outdoor air		Solvent extraction	GC/PCI-MS, GC/NCI-MS	0.2–2.5 pg/m3(MQL)		individual PFAS ND- 106 pg/m3	Jahnke A., Ahrens L., Ebinghaus R., Berger U., Barber J.L., Temme C. An improved method for the analysis of volatile polyfluorinated alkyl substances in environmental air samples Anal. Bioanal. Chem., 387 (3) (2007), pp. 965-975
N-Me-FBSA, N-Me-FBSE, N-Me-FOSE, N-Et-FOSE, N-Me-FOSA, N-Et-FOSA, 4:2 ,6:2, 8:2, 10:2, 12:2 FTOH	Indoor and outdoor air		Solvent extraction	GC/PCI-MS, GC/NCI-MS	0.01–120 pg/m3		PFOA 1–818 pg/m3, 8:2 FTOH 5–243 pg/m3, 6:2 FTOH 5–189 pg/m3	Barber J.L., Berger U., Chaemfa C., Huber S., Jahnke A., Temme C., Jones K.C. Analysis of per-and polyfluorinated alkyl substances in air samples from Northwest Europe J. Environ. Monit., 9 (6) (2007), pp. 530-541
N-Me-FOSEA, N-Me-FOSE, N-Et-FOSE, 6:2, 8:2, 10:2 FTOH	Indoor air		Soxhlet extraction	GC/PCI-MS				Shoeib M., Harner T., Lee S.C., Lane D., Zhu J. Sorbent-impregnated polyurethane foam disk for passive air sampling of volatile fluorinated chemicals Anal. Chem., 80 (3) (2008), pp. 675-682
PFBS, PFPS, PFHxS, PFHpS, PFOS, PFNS, PFDcS, PFBA, PFPA, PFHxA, PFHpA, PFOA, PFNA, PFDcA, PFUnA, PFDoA, 4:2, 6:2, 8:2, 10:2 FTOH, N-Me-FOSE, N-Et-FOSE, N-Me-FOSA, N-Et-FOSA, 6:2, 8:2 FTS	House dust Air		Solvent extraction	LC-QTOF-MS, GC/PCI-MS, GC/NCI-MS	0.5–81.1 ng/L 25 ng/L		PFSAs 1- 80.1 ng/g; FOTHs 4.7 - 17.9 ng/m3	Huber S., Haug L.S., Schlabach M. Per-and polyfluorinated compounds in house dust and indoor air from northern Norway–A pilot study Chemosphere, 84 (11) (2011), pp. 1686-1693
8:2 FTO, 6:2, 8:2 FTA, 4:2, 6:2, 8:2, 10:2, 12:2 FTOH, N-Me-FBSA, N-Me-FOSA, N-Et-FOSA, N-Me-FBSE, N-Me-FOSE, N-Et-FOSE	Air		Cold column extraction	GC/PCI-MS	0.09–1.85 pg/m3(MDL)		FTOHs 604- 446000 pg/m3, MeFOSE 390−1110 pg/m3	Li J., Del Vento S., Schuster J., Zhang G., Chakraborty P., Kobara Y., Jones K.C. Perfluorinated compounds in the Asian atmosphere Environ. Sci. Technol., 45 (17) (2011), pp. 7241-7248
n:2 FTOHs (n = 6, 8, 10), MeFOSA, EtFOSA, MeFOSE, EtFOSE	Indoor air		SPE	GC/PCI-MS	0.03–71 pg/m3			Padilla-Sánchez J.A., Papadopoulou E., Poothong S., Haug L.S. Investigation of the best approach for assessing human exposure to poly-and perfluoroalkyl substances through indoor air Environ. Sci. Technol., 51 (21) (2017), pp. 12836-12843
PFBA, PFPeA, PFHxA, PFHpA, PFOA, PFNA, PFDA, PFUnDA, PFDoDA, PFOS, PFHxS, PFBS, MeFOSA, EtFOSA, EtFOSE, MeFOSE, n:2 FTOHs (n = 6, 8, 10), n:2 FTUCAs, n:2 diPAPs (n = 6, 8)	Indoor air		SPE	GC/PCI-MS HPLC/(-) ESIMS/ MS	0.9–26.3 pg/m3 (MDL)		FTOHs: 250–82 300 pg/m3 in air, 24.8–678 ng/g in dust; diPAPs: nd–125 pg/m3 in air, 0.32–183 ng/g in dust; PFCAs: 121–20 600 pg/m3 in air	Yao Y., Zhao Y., Sun H., Chang S., Zhu L., Alder A.C., Kannan K. Per-and polyfluoroalkyl Substances (PFASs) in Indoor Air and dust from homes and various Microenvironments in China: Implications for human exposure Environ. Sci. Technol., 52 (5) (2018), pp. 3156-3166
6:2, 8:2, 10:2 FTOH, Me-FOSA, Et-FOSA, 6:2 FTMAC, 8:2, 10:2 FTAC, 6:6, 6:8, 8:8 PFPIA, 6:2, 8:2 monoPAPs, 6:2, 8:2 diPAPs, PFOS, PFOA, PFDS, PFBS, PFHxS	Indoor dust and packaging materials		Soxhlet extraction, SPE	LC/(-)ESI-MS/MS, GC/PCI-MS	0.29–2.40 ng/g		1.3 - 69 ng/g	Shoeib T., Hassan Y., Rauert C., Harner T. Poly-and perfluoroalkyl substances (PFASs) in indoor dust and food packaging materials in Egypt: Trends in developed and developing countries Chemosphere, 144 (2016), pp. 1573-1581
PFCAs (n= 4-14, 16,18), PFSAs (n =4, 6, 8, 10) n:2 FTOHs, n:2 FTACs (n = 6, 8, 10), FOSA, MeFOSA, EtFOSA, MeFOSE, EtFOSE, 6:2 FTSA	Outdoor air	High volume sampler with GFF, XAD sample volume 1200, 2000 m3	PLE, sonication (MeOH): GFF	GC-PCI-MS UHPLC-ESI(_x0002_-)-MS/MS UHPLC-ESI(-_x0002_)-TOF-MS	0.008-4.2 pg/m3	Field blanks, laboratory blanks recoveries	FTOH (median): 3.8 pg/m3 FASE (median): 0.49 pg/m3 FASA (median): 0.13 pg/m3 FTAC (median): 0.24 pg/m3 FOSA (median): 0.12 pg/m3	F. Wong, M. Shoeib, A. Katsoyiannis, S. Eckhardt, A. Stohl, P. Bohlin-Nizzetto, H. Li, P. Fellin, Y. Su, H. Hung Assessing temporal trends and source regions of per- and polyfluoroalkyl substances (PFASs) in air under the Arctic Monitoring and Assessment Programme (AMAP), Atmos Environ. Times, 172 (2018), pp. 65-73,
n:2 FTOHs (n = 6, 8, 10), MeFOSA, EtFOSA, MeFOSE, EtFOSE	Indoor air/ personal air	Low volume sampler SPE (ENVI+) Sample volume 7.2/1.44 m3	SPE/ MeOH	GC-PCI-MS	0.03-71 pg/m3 (indoor air) 1.4-350 pg/m3 (personal air) (MDL)	Breakthroughs, field blanks	FTOH: 170-446,000 pg/m3 FASA: <MDL-78,300 pg/m3 FASE: <MDL-38,800 pg/m3	J.A. Padilla-Sánchez, E. Papadopoulou, S. Poothong, L.S. Haug Investigation of the best approach for assessing human exposure to poly- and perfluoroalkyl substances through indoor air Environ. Sci. Technol., 51 (2017), pp. 12836-12843
PFCAs (n= 4-12), PFSAs (n =4, 6, 8) MeFOSA, EtFOSA, MeFOSE, EtFOSE, n:2 FTOHs (n=6, 8, 10), n:2 FTUCAs, n:2 diPAPs (n=6, 8)	Indoor air	Low volume sampler SPE (WAX/HC-C18) Sample volume 0.172-8.33 m3	SPE with Ethyl acetate 0.5% NH4OH MeOH	GC-PCI-MS HPLC-ESI(-_x0002_)-MS/MS	GC/MS 22-157 ng/L (LOD) 3.7-26.3 pg (MDL) LC/MS 12-107 ng/L (LOD) 0.9-17.7 pg (MDL)	Procedure blanks, breakthroughs recoveries	FTOH: 249-62,100 pg/m3 PFCA: 121-8,670 pg/m3 PFSA: 71.2-1,780 pg/m3 diPAP: ND-125 pg/m3 FASA/E: ND-2,460 pg/m3 FTUCA: ND-413 pg/m3	Y. Yao, Y. Zhao, H. Sun, S. Chang, L. Zhu, A.C. Alder, K. Kannan Per- and polyfluoroalkyl substances (PFASs) in indoor air and dust from homes and various microenvironments in China: implications for human exposure Environ. Sci. Technol., 52 (2018), pp. 3156-3166
8:2 FTO, n:2 FTOHs (n = 4, 6, 8, 10, 12), n:2 FTACs (n = 6, 8), MeFBSA, MeFOSA, EtFOSA, MeFBSE, MeFOSE, EtFOSE	Outdoor air	Passive air sampler SIP disk	EtOAc (cold column extraction) ENVI-Carb	GC-PCI-MS	0.09-1.85 pg/m3	Field blanks, laboratory blanks recoveries	FTOH: 51.4-1,210 pg/m3 FTAC: 0.20-15.3 pg/m3 FASA: 3.22-831 pg/m3 FASE: 7.44-172 pg/m3	J. Li, S. Del Vento, J. Schuster, G. Zhang, P. Chakraborty, Y. Kobara, K.C. Jones Perfluorinated compounds in the Asian atmosphere Environ. Sci. Technol., 45 (2011), pp. 7241-7248
PFCAs (n= 2-12), PFSAs (n =4, 6, 8) n:2 FTOHs (n = 6, 8,10), n:2 diPAPs (n =6, 8), MeFOSA, EtFOSA, MeFOSE, EtFOSE	Outdoor air	Passive air sampler SIP disk	Soxhlet: EtOAc, MeOH ENVI-Carb	GC-PCI-MS HPLC-ESI(-_x0002_)-MS/MS	0.02-0.22 pg/m3	Field blanks, procedure blanks recoveries	FTOH: 58-2,100 pg/m3 FASA:ND-13 pg/m3 PFAS (C>4): 280-820 pg/m3 diPAP: <MDL-12 pg/m3 TFA: 1.4-3.0 ng/m3	Y. Tian, Y. Yao, S. Chang, Z. Zhao, Y. Zhao, X. Yuan, F. Wu, H. Sun Occurrence and phase distribution of neutral and ionizable per- and polyfluoroalkyl substances (PFASs) in the atmosphere and plant leaves around landfills: a case study in Tianjin, China Environ. Sci. Technol., 52 (2018), pp. 1301-1310
PFCAs (n= 7-12), PFSAs (n =6, 8)	Outdoor air	Cascade impactor QFF	MeOH shaking, sonication filtration	HPLC-ESI(−)-MS/MS	0.08–2.89 pg/m3	Field blanks, procedure blanks recoveries	0.26–1.98 ng/m3	M. Guo, Y. Lyu, T. Xu, B. Yao, W. Song, M. Li, X. Yang, T. Cheng, X. Li Particle size distribution and respiratory deposition estimates of airborne perfluoroalkyl acids during the haze period in the megacity of Shanghai Environ. Pollut., 234 (2018), pp. 9-19
PFCAs (n=4-14, 16, 18), PFSAs (n =4-10), PFOSA, MeFOSA, EtFOSA, MeFOSE, EtFOSE, n:2 FTOHs (n=4, 6, 8, 10, 7 (secondary)), n:2 and n:3 FTUCAs, n:2 FTUCAs, n:2 PAPs (n=6, 8), n:2 diPAPs (n=6, 8), ADONA, Gen-X, F-53B, n:2 FTSAs (n=4, 6, 8), PFPis, PFAPAs	Muscle and liver of mammals, fish and bird		ASE & SPE	LC/(-)ESI-MS/MS	0.02 - 1.25 ng/g wet weight (MDL), 0.05 - 3.79 ng/g wet weight (MQL)	isotopic dilution / standard addition	ΣPFAS 0.016 - 20.2 μg/g wet weight	Andreas Androulakakis, Nikiforos Alygizakis, Georgios Gkotsis, Maria-Christina Nika, Varvara Nikolopoulou, Erasmia Bizani, Elizabeth Chadwick, Alessandra Cincinelli, Daniela Claßen, Sara Danielsson, Rene W.R.J. Dekker, Guy Duke, Natalia Glowacka, Hugh A.H. Jansman, Oliver Krone, Tania Martellini, Paola Movalli, Sara Persson, Anna Roos, Emily O'Rourke, Ursula Siebert, Gabriele Treu, Nico W. van de…
